# Supplementary material
Source: HighWire-hosted journal article supplement (http://www.jneurosci.org/highwire/filestream/601664/field_highwire_adjunct_files/0/Supplemental_Figures.pdf)
Supplement: Supplemental_Figures.pdf [file Supplemental_Figures.pdf]

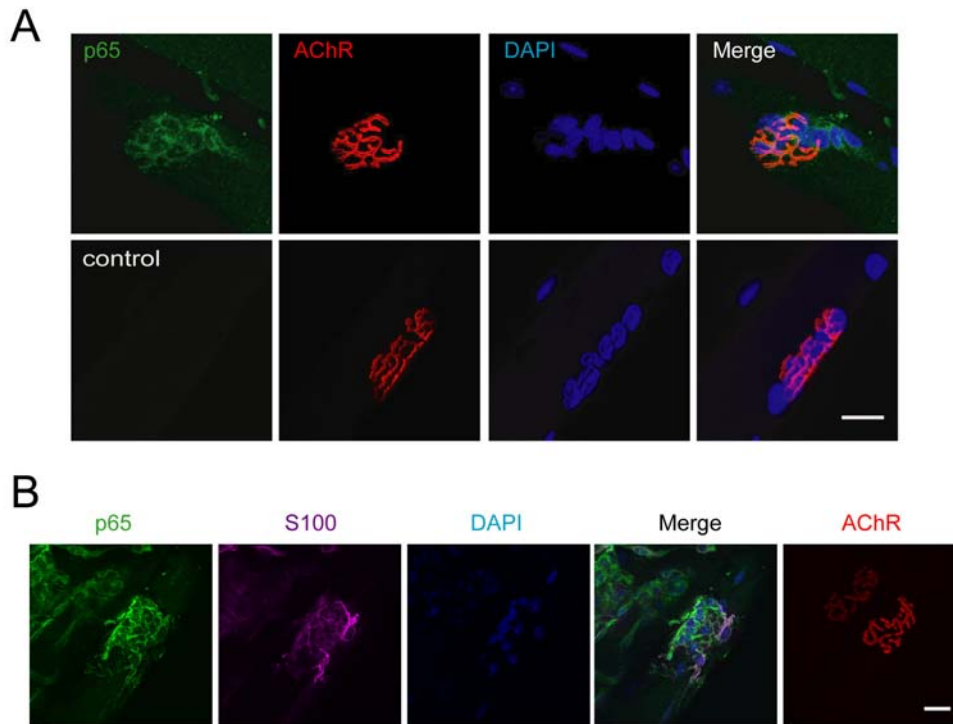

Fig. S1

**Supplemental Figure S1.** Localization of RelA/p65 at the NMJ. **A**, Teased soleus muscles from adult mice were stained with R-BTX and anti-RelA/p65 antibody. DAPI was used to mark nuclear. Rabbit IgG was used as a negative control. Scale bar, 20  $\mu\text{m}$ . **B**, Soleus muscles from adult mice were co-stained with RelA/p65 (rabbit antibody), R-BTX, and Schwann cell marker S100 (mouse antibody). Alexa Fluor® 488 goat anti-Rabbit IgG and Alexa Fluor® 647 goat anti-mouse IgG were used as second antibodies. Scale bar, 20  $\mu\text{m}$ .

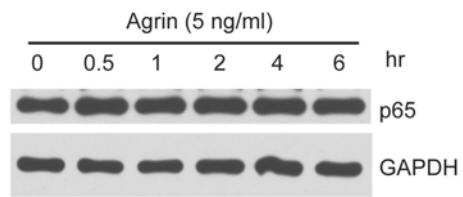

Fig. S2

**Supplemental Figure S2.** Agrin has no effect on RelA/p65 expression. Fully differentiated C2C12 myotubes were treated with Agrin (5 ng/ml) for indicated time, and cell lysates (10  $\mu$ g proteins) were subjected to IB with indicated antibodies.

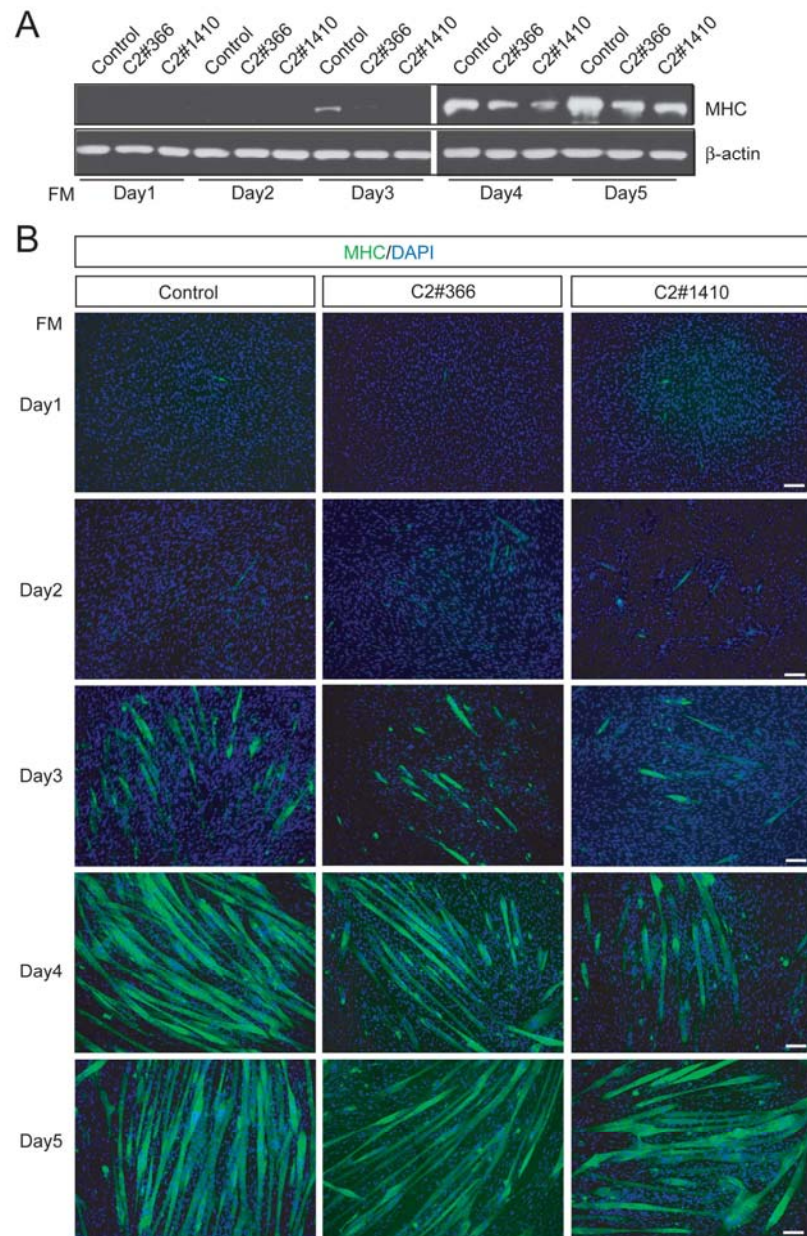

Fig. S3

**Supplemental Figure S3.** Myotube formation in Rel A/P65 knock-down cells. Stable cell lines (C2#366 and #1410) cultured in growth media were switched to fusion media at 50% confluence for different days (Day1 to 5). During this period, cells were lysed and subjected to western blot with anti-MHC antibody, using  $\beta$ -actin as loading control (**A**) or stained with MHC and DAPI to examine myotube formation (**B**). Note that at day 5, normal myotubes were formed in all three groups. Scale bar, 100  $\mu$ m.

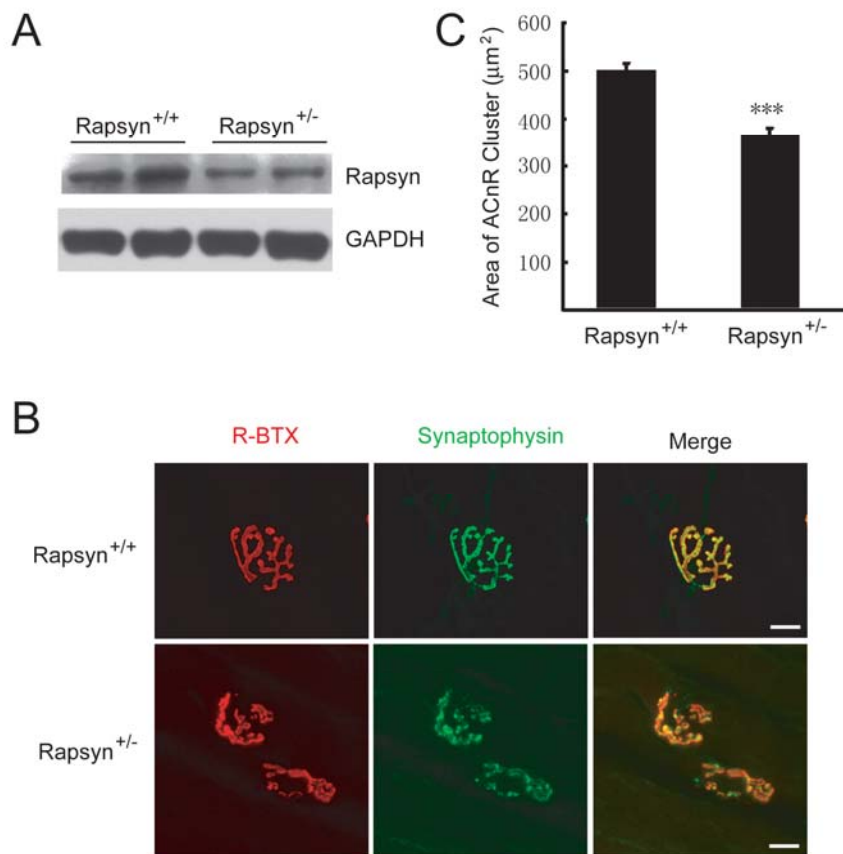

Fig. S4

**Supplemental Figure S4.** Aberrant AChR clustering in adult Rapsyn<sup>+/-</sup> mutant mice. **A**, Muscle homogenates (20 μg protein) of Rapsyn<sup>+/-</sup> or littermate control mice at P60 were subjected to IB with indicated antibodies. Note that Rapsyn was down-regulated in Rapsyn<sup>+/-</sup> mice. **B**, Sternomastoid muscles of Rapsyn<sup>+/-</sup> or littermate controls (Rapsyn<sup>+/+</sup>) at P60 were stained with R-BTX and anti-Synaptophysin antibody. Shown are representative images. Scale bar, 20 μm. **C**, Quantification for the average area of individual NMJs (n=35 for Rapsyn<sup>+/+</sup>; n=25 for Rapsyn<sup>+/-</sup>). \*\*\**p*<0.001, Student's *t* test.
